# Supplementary material for: Mapping Arable Land and Permanent Agriculture Extent and Change in Southern Greece Using the European Union LUCAS Survey and a 35-Year Landsat Time Series Analysis
Source: MDPI journal article supplement (doi:10.3390/rs14143369), 2022-07-13
Supplement: s1 [file s1]

Table S1. Confusion matrix for the 1993-1994 time period. UA = User's accuracy (%), PA = Producer's accuracy (%).

| #   | Map strata             | Reference strata |      |      |      |      |       |       |      |      |      |      | UA   |
|-----|------------------------|------------------|------|------|------|------|-------|-------|------|------|------|------|------|
|     |                        | 1                | 2    | 3    | 4    | 1-2  | 1-3   | 2-1   | 2-3  | 3-1  | 3-2  | 5    |      |
| 1   | Stable Arable          | 54               | 3    | 1    | 0    | 0    | 0     | 0     | 0    | 0    | 0    | 0    | 93.1 |
| 2   | Stable Perm            | 1                | 68   | 7    | 0    | 0    | 0     | 0     | 0    | 0    | 0    | 0    | 89.5 |
| 3   | Stable Nat veg         | 1                | 6    | 294  | 0    | 0    | 0     | 0     | 0    | 0    | 0    | 0    | 97.7 |
| 4   | Stable Nonveg          | 0                | 0    | 5    | 65   | 0    | 0     | 0     | 0    | 0    | 0    | 4    | 87.8 |
| 1-2 | Arable -> Perm         | 19               | 16   | 1    | 0    | 15   | 0     | 0     | 0    | 0    | 0    | 0    | 29.4 |
| 1-3 | Arable -> Non-ag       | 24               | 2    | 3    | 0    | 1    | 23    | 0     | 0    | 0    | 0    | 0    | 43.4 |
| 2-1 | Perm -> Arable         | 9                | 12   | 0    | 0    | 0    | 0     | 23    | 0    | 6    | 0    | 0    | 46.0 |
| 2-3 | Perm -> Non-ag         | 0                | 16   | 19   | 0    | 0    | 0     | 0     | 12   | 1    | 1    | 1    | 24.0 |
| 3-1 | Non-ag -> Arable       | 8                | 3    | 1    | 0    | 0    | 0     | 0     | 0    | 42   | 1    | 0    | 76.4 |
| 3-2 | Non-ag -> Perm         | 3                | 6    | 3    | 0    | 0    | 0     | 0     | 1    | 1    | 42   | 0    | 75.0 |
| 5   | All other -> All other | 0                | 2    | 4    | 4    | 0    | 0     | 0     | 0    | 0    | 2    | 38   | 76.0 |
| PA  |                        | 45.4             | 50.7 | 87.0 | 94.2 | 93.8 | 100.0 | 100.0 | 92.3 | 84.0 | 91.3 | 88.4 |      |

Table S2. Confusion matrix for the 2000-2001 time period. UA = User's accuracy (%), PA = Producer's accuracy (%).

| #   | Map strata             | Reference strata |      |      |      |       |      |       |      |      |      |      | UA   |
|-----|------------------------|------------------|------|------|------|-------|------|-------|------|------|------|------|------|
|     |                        | 1                | 2    | 3    | 4    | 1-2   | 1-3  | 2-1   | 2-3  | 3-1  | 3-2  | 5    |      |
| 1   | Stable Arable          | 51               | 3    | 3    | 0    | 0     | 0    | 0     | 0    | 0    | 0    | 0    | 89.5 |
| 2   | Stable Perm            | 0                | 72   | 3    | 0    | 0     | 0    | 0     | 0    | 0    | 0    | 0    | 96.0 |
| 3   | Stable Nat veg         | 2                | 1    | 293  | 0    | 0     | 0    | 0     | 0    | 0    | 0    | 4    | 97.7 |
| 4   | Stable Nonveg          | 0                | 0    | 3    | 78   | 0     | 0    | 0     | 0    | 0    | 0    | 0    | 96.3 |
| 1-2 | Arable -> Perm         | 13               | 22   | 1    | 0    | 16    | 2    | 0     | 0    | 0    | 1    | 0    | 29.1 |
| 1-3 | Arable -> Non-ag       | 16               | 1    | 7    | 0    | 0     | 30   | 0     | 0    | 1    | 0    | 0    | 54.5 |
| 2-1 | Perm -> Arable         | 23               | 12   | 1    | 0    | 0     | 2    | 10    | 1    | 1    | 0    | 0    | 20.0 |
| 2-3 | Perm -> Non-ag         | 1                | 10   | 25   | 0    | 0     | 0    | 0     | 15   | 0    | 0    | 4    | 27.3 |
| 3-1 | Non-ag -> Arable       | 17               | 4    | 4    | 0    | 0     | 0    | 0     | 0    | 24   | 0    | 1    | 48.0 |
| 3-2 | Non-ag -> Perm         | 0                | 9    | 16   | 0    | 0     | 0    | 0     | 0    | 1    | 26   | 1    | 49.1 |
| 5   | All other -> All other | 1                | 2    | 8    | 4    | 0     | 0    | 0     | 0    | 2    | 0    | 33   | 66.0 |
| PA  |                        | 41.1             | 52.9 | 80.5 | 95.1 | 100.0 | 88.2 | 100.0 | 93.8 | 82.8 | 96.3 | 76.7 |      |

Table S3. Confusion matrix for the 2016-2017 time period. UA = User's accuracy (%), PA = Producer's accuracy (%).

| #   | Map strata             | Reference strata |      |      |      |       |      |       |       |      |       |      | UA   |
|-----|------------------------|------------------|------|------|------|-------|------|-------|-------|------|-------|------|------|
|     |                        | 1                | 2    | 3    | 4    | 1-2   | 1-3  | 2-1   | 2-3   | 3-1  | 3-2   | 5    |      |
| 1   | Stable Arable          | 61               | 10   | 0    | 0    | 0     | 0    | 0     | 0     | 0    | 0     | 0    | 85.9 |
| 2   | Stable Perm            | 2                | 63   | 10   | 0    | 0     | 0    | 0     | 0     | 0    | 0     | 0    | 84.0 |
| 3   | Stable Natural veg     | 0                | 4    | 300  | 0    | 0     | 0    | 0     | 0     | 0    | 0     | 0    | 98.7 |
| 4   | Stable Nonveg          | 0                | 0    | 1    | 74   | 0     | 0    | 0     | 0     | 0    | 0     | 0    | 98.7 |
| 1-2 | Arable -> Perm         | 7                | 24   | 5    | 0    | 12    | 2    | 0     | 0     | 0    | 0     | 0    | 24.0 |
| 1-3 | Arable -> Non-ag       | 11               | 3    | 8    | 0    | 0     | 32   | 0     | 0     | 1    | 0     | 3    | 55.2 |
| 2-1 | Perm -> Arable         | 15               | 14   | 2    | 0    | 0     | 0    | 15    | 0     | 4    | 0     | 0    | 30.0 |
| 2-3 | Perm -> Non-ag         | 1                | 20   | 21   | 1    | 0     | 0    | 0     | 9     | 0    | 0     | 5    | 15.8 |
| 3-1 | Non-ag -> Arable       | 8                | 4    | 23   | 0    | 0     | 0    | 0     | 0     | 19   | 0     | 1    | 35.5 |
| 3-2 | Non-ag -> Perm         | 2                | 28   | 30   | 0    | 0     | 0    | 0     | 0     | 0    | 4     | 0    | 6.0  |
| 5   | All other -> All other | 0                | 1    | 0    | 3    | 0     | 0    | 0     | 0     | 0    | 0     | 48   | 92.3 |
| PA  |                        | 57.0             | 36.8 | 75.0 | 94.9 | 100.0 | 94.1 | 100.0 | 100.0 | 79.2 | 100.0 | 84.2 |      |
